# Supplementary material for: Metabolites in Cherry Buds to Detect Winter Dormancy
Source: MDPI journal article supplement (doi:10.3390/metabo12030247), 2022-03-16
Supplement: s1 [file s1]

**Figure S1:** Heatmap of the scaled intensity for 445 metabolites during 4 phases of sweet cherry bud development (cv. 'Summit') in the 2015/16 season. Phase 1: End of paradormancy, Phase 2: Endodormancy, Phase 3: Ecodormancy, Phase 4: First stage of ontogenetic development

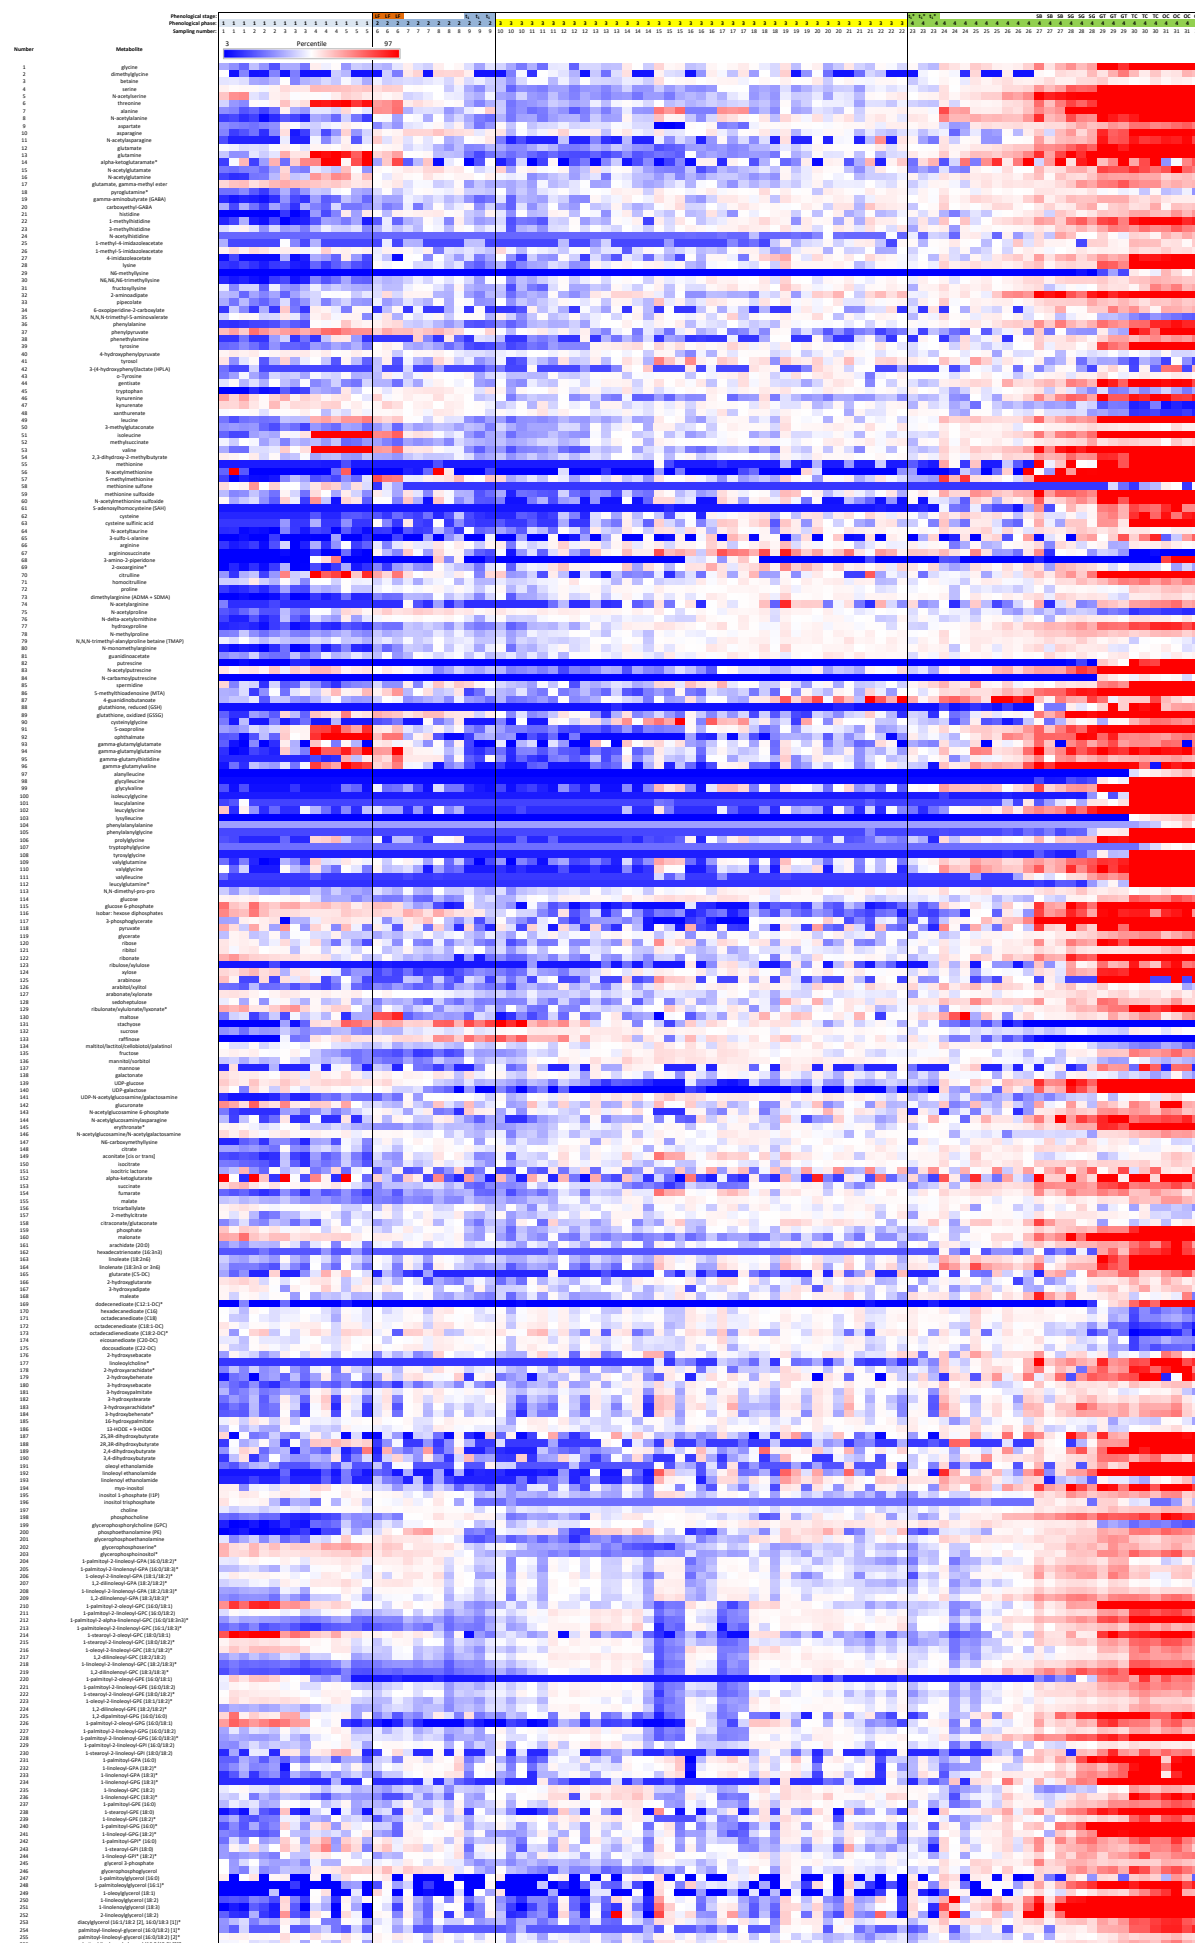

[illegible]
