# Supplementary material for: Metabolites in Cherry Buds to Detect Winter Dormancy
Source: MDPI journal article supplement (doi:10.3390/metabo12030247), 2022-03-16
Supplement: s1 [file s1]

**Table S1:** List of 445 metabolites found in sweet cherry buds (cv. 'Summit') in the 2015/16 season

| Number | Metabolite                        | Super Pathway | Sub-Pathway                                      |
|--------|-----------------------------------|---------------|--------------------------------------------------|
| 1      | glycine                           | Amino Acid    | Glycine, Serine and Threonine Metabolism         |
| 2      | dimethylglycine                   | Amino Acid    | Glycine, Serine and Threonine Metabolism         |
| 3      | betaine                           | Amino Acid    | Glycine, Serine and Threonine Metabolism         |
| 4      | serine                            | Amino Acid    | Glycine, Serine and Threonine Metabolism         |
| 5      | N-acetylserine                    | Amino Acid    | Glycine, Serine and Threonine Metabolism         |
| 6      | threonine                         | Amino Acid    | Glycine, Serine and Threonine Metabolism         |
| 7      | alanine                           | Amino Acid    | Alanine and Aspartate Metabolism                 |
| 8      | N-acetylalanine                   | Amino Acid    | Alanine and Aspartate Metabolism                 |
| 9      | aspartate                         | Amino Acid    | Alanine and Aspartate Metabolism                 |
| 10     | asparagine                        | Amino Acid    | Alanine and Aspartate Metabolism                 |
| 11     | N-acetylaspargine                 | Amino Acid    | Alanine and Aspartate Metabolism                 |
| 12     | glutamate                         | Amino Acid    | Glutamate Metabolism                             |
| 13     | glutamine                         | Amino Acid    | Glutamate Metabolism                             |
| 14     | alpha-ketoglutarate*              | Amino Acid    | Glutamate Metabolism                             |
| 15     | N-acetylglutamate                 | Amino Acid    | Glutamate Metabolism                             |
| 16     | N-acetylglutamine                 | Amino Acid    | Glutamate Metabolism                             |
| 17     | glutamate, gamma-methyl ester     | Amino Acid    | Glutamate Metabolism                             |
| 18     | pyroglutamine*                    | Amino Acid    | Glutamate Metabolism                             |
| 19     | gamma-aminobutyrate (GABA)        | Amino Acid    | Glutamate Metabolism                             |
| 20     | carboxyethyl-GABA                 | Amino Acid    | Glutamate Metabolism                             |
| 21     | histidine                         | Amino Acid    | Histidine Metabolism                             |
| 22     | 1-methylhistidine                 | Amino Acid    | Histidine Metabolism                             |
| 23     | 3-methylhistidine                 | Amino Acid    | Histidine Metabolism                             |
| 24     | N-acetylhistidine                 | Amino Acid    | Histidine Metabolism                             |
| 25     | 1-methyl-4-imidazoleacetate       | Amino Acid    | Histidine Metabolism                             |
| 26     | 1-methyl-5-imidazoleacetate       | Amino Acid    | Histidine Metabolism                             |
| 27     | 4-imidazoleacetate                | Amino Acid    | Histidine Metabolism                             |
| 28     | lysine                            | Amino Acid    | Lysine Metabolism                                |
| 29     | N6-methyllysine                   | Amino Acid    | Lysine Metabolism                                |
| 30     | N6,N6,N6-trimethyllysine          | Amino Acid    | Lysine Metabolism                                |
| 31     | fructosyllsine                    | Amino Acid    | Lysine Metabolism                                |
| 32     | 2-aminoadipate                    | Amino Acid    | Lysine Metabolism                                |
| 33     | pipecolate                        | Amino Acid    | Lysine Metabolism                                |
| 34     | 6-oxopiperidine-2-carboxylate     | Amino Acid    | Lysine Metabolism                                |
| 35     | N,N,N-trimethyl-5-aminovalerate   | Amino Acid    | Lysine Metabolism                                |
| 36     | phenylalanine                     | Amino Acid    | Phenylalanine Metabolism                         |
| 37     | phenylpyruvate                    | Amino Acid    | Phenylalanine Metabolism                         |
| 38     | phenethylamine                    | Amino Acid    | Phenylalanine Metabolism                         |
| 39     | tyrosine                          | Amino Acid    | Tyrosine Metabolism                              |
| 40     | 4-hydroxyphenylpyruvate           | Amino Acid    | Tyrosine Metabolism                              |
| 41     | tyrosol                           | Amino Acid    | Tyrosine Metabolism                              |
| 42     | 3-(4-hydroxyphenyl)lactate (HPLA) | Amino Acid    | Tyrosine Metabolism                              |
| 43     | o-Tyrosine                        | Amino Acid    | Tyrosine Metabolism                              |
| 44     | gentisate                         | Amino Acid    | Tyrosine Metabolism                              |
| 45     | tryptophan                        | Amino Acid    | Tryptophan Metabolism                            |
| 46     | kynurenine                        | Amino Acid    | Tryptophan Metabolism                            |
| 47     | kynurenate                        | Amino Acid    | Tryptophan Metabolism                            |
| 48     | xanthurenate                      | Amino Acid    | Tryptophan Metabolism                            |
| 49     | leucine                           | Amino Acid    | Leucine, Isoleucine and Valine Metabolism        |
| 50     | 3-methylglutaconate               | Amino Acid    | Leucine, Isoleucine and Valine Metabolism        |
| 51     | isoleucine                        | Amino Acid    | Leucine, Isoleucine and Valine Metabolism        |
| 52     | methylsuccinate                   | Amino Acid    | Leucine, Isoleucine and Valine Metabolism        |
| 53     | valine                            | Amino Acid    | Leucine, Isoleucine and Valine Metabolism        |
| 54     | 2,3-dihydroxy-2-methylbutyrate    | Amino Acid    | Leucine, Isoleucine and Valine Metabolism        |
| 55     | methionine                        | Amino Acid    | Methionine, Cysteine, SAM and Taurine Metabolism |
| 56     | N-acetylmethionine                | Amino Acid    | Methionine, Cysteine, SAM and Taurine Metabolism |
| 57     | S-methylmethionine                | Amino Acid    | Methionine, Cysteine, SAM and Taurine Metabolism |
| 58     | methionine sulfone                | Amino Acid    | Methionine, Cysteine, SAM and Taurine Metabolism |
| 59     | methionine sulfoxide              | Amino Acid    | Methionine, Cysteine, SAM and Taurine Metabolism |
| 60     | N-acetylmethionine sulfoxide      | Amino Acid    | Methionine, Cysteine, SAM and Taurine Metabolism |
| 61     | S-adenosylhomocysteine (SAH)      | Amino Acid    | Methionine, Cysteine, SAM and Taurine Metabolism |
| 62     | cysteine                          | Amino Acid    | Methionine, Cysteine, SAM and Taurine Metabolism |
| 63     | cysteine sulfinic acid            | Amino Acid    | Methionine, Cysteine, SAM and Taurine Metabolism |
| 64     | N-acetyltaurine                   | Amino Acid    | Methionine, Cysteine, SAM and Taurine Metabolism |
| 65     | 3-sulfo-L-alanine                 | Amino Acid    | Methionine, Cysteine, SAM and Taurine Metabolism |
| 66     | arginine                          | Amino Acid    | Urea cycle; Arginine and Proline Metabolism      |
| 67     | argininosuccinate                 | Amino Acid    | Urea cycle; Arginine and Proline Metabolism      |
| 68     | 3-amino-2-piperidone              | Amino Acid    | Urea cycle; Arginine and Proline Metabolism      |

|     |                                              |              |                                                      |
|-----|----------------------------------------------|--------------|------------------------------------------------------|
| 69  | 2-oxoarginine*                               | Amino Acid   | Urea cycle; Arginine and Proline Metabolism          |
| 70  | citrulline                                   | Amino Acid   | Urea cycle; Arginine and Proline Metabolism          |
| 71  | homocitrulline                               | Amino Acid   | Urea cycle; Arginine and Proline Metabolism          |
| 72  | proline                                      | Amino Acid   | Urea cycle; Arginine and Proline Metabolism          |
| 73  | dimethylarginine (ADMA + SDMA)               | Amino Acid   | Urea cycle; Arginine and Proline Metabolism          |
| 74  | N-acetylarginine                             | Amino Acid   | Urea cycle; Arginine and Proline Metabolism          |
| 75  | N-acetylproline                              | Amino Acid   | Urea cycle; Arginine and Proline Metabolism          |
| 76  | N-delta-acetylornithine                      | Amino Acid   | Urea cycle; Arginine and Proline Metabolism          |
| 77  | hydroxyproline                               | Amino Acid   | Urea cycle; Arginine and Proline Metabolism          |
| 78  | N-methylproline                              | Amino Acid   | Urea cycle; Arginine and Proline Metabolism          |
| 79  | N,N,N-trimethyl-alanylproline betaine (TMAP) | Amino Acid   | Urea cycle; Arginine and Proline Metabolism          |
| 80  | N-monomethylarginine                         | Amino Acid   | Urea cycle; Arginine and Proline Metabolism          |
| 81  | guanidinoacetate                             | Amino Acid   | Creatine Metabolism                                  |
| 82  | putrescine                                   | Amino Acid   | Polyamine Metabolism                                 |
| 83  | N-acetylputrescine                           | Amino Acid   | Polyamine Metabolism                                 |
| 84  | N-carbamoylputrescine                        | Amino Acid   | Polyamine Metabolism                                 |
| 85  | spermidine                                   | Amino Acid   | Polyamine Metabolism                                 |
| 86  | 5-methylthioadenosine (MTA)                  | Amino Acid   | Polyamine Metabolism                                 |
| 87  | 4-guanidinobutanoate                         | Amino Acid   | Guanidino and Acetamido Metabolism                   |
| 88  | glutathione, reduced (GSH)                   | Amino Acid   | Glutathione Metabolism                               |
| 89  | glutathione, oxidized (GSSG)                 | Amino Acid   | Glutathione Metabolism                               |
| 90  | cysteinylglycine                             | Amino Acid   | Glutathione Metabolism                               |
| 91  | 5-oxoproline                                 | Amino Acid   | Glutathione Metabolism                               |
| 92  | ophthalmate                                  | Amino Acid   | Glutathione Metabolism                               |
| 93  | gamma-glutamylglutamate                      | Peptide      | Gamma-glutamyl Amino Acid                            |
| 94  | gamma-glutamylglutamine                      | Peptide      | Gamma-glutamyl Amino Acid                            |
| 95  | gamma-glutamylhistidine                      | Peptide      | Gamma-glutamyl Amino Acid                            |
| 96  | gamma-glutamylvaline                         | Peptide      | Gamma-glutamyl Amino Acid                            |
| 97  | alanylleucine                                | Peptide      | Dipeptide                                            |
| 98  | glycylleucine                                | Peptide      | Dipeptide                                            |
| 99  | glycylvaline                                 | Peptide      | Dipeptide                                            |
| 100 | isoleucylglycine                             | Peptide      | Dipeptide                                            |
| 101 | leucylalanine                                | Peptide      | Dipeptide                                            |
| 102 | leucylglycine                                | Peptide      | Dipeptide                                            |
| 103 | lysylleucine                                 | Peptide      | Dipeptide                                            |
| 104 | phenylalanylalanine                          | Peptide      | Dipeptide                                            |
| 105 | phenylalanylglycine                          | Peptide      | Dipeptide                                            |
| 106 | prolylglycine                                | Peptide      | Dipeptide                                            |
| 107 | tryptophylglycine                            | Peptide      | Dipeptide                                            |
| 108 | tyrosylglycine                               | Peptide      | Dipeptide                                            |
| 109 | valylglutamine                               | Peptide      | Dipeptide                                            |
| 110 | valylglycine                                 | Peptide      | Dipeptide                                            |
| 111 | valylleucine                                 | Peptide      | Dipeptide                                            |
| 112 | leucylglutamine*                             | Peptide      | Dipeptide                                            |
| 113 | N,N-dimethyl-pro-pro                         | Peptide      | Modified Peptides                                    |
| 114 | glucose                                      | Carbohydrate | Glycolysis, Gluconeogenesis, and Pyruvate Metabolism |
| 115 | glucose 6-phosphate                          | Carbohydrate | Glycolysis, Gluconeogenesis, and Pyruvate Metabolism |
| 116 | Isobar: hexose diphosphates                  | Carbohydrate | Glycolysis, Gluconeogenesis, and Pyruvate Metabolism |
| 117 | 3-phosphoglycerate                           | Carbohydrate | Glycolysis, Gluconeogenesis, and Pyruvate Metabolism |
| 118 | pyruvate                                     | Carbohydrate | Glycolysis, Gluconeogenesis, and Pyruvate Metabolism |
| 119 | glycerate                                    | Carbohydrate | Glycolysis, Gluconeogenesis, and Pyruvate Metabolism |
| 120 | ribose                                       | Carbohydrate | Pentose Metabolism                                   |
| 121 | ribitol                                      | Carbohydrate | Pentose Metabolism                                   |
| 122 | ribonate                                     | Carbohydrate | Pentose Metabolism                                   |
| 123 | ribulose/xylulose                            | Carbohydrate | Pentose Metabolism                                   |
| 124 | xylose                                       | Carbohydrate | Pentose Metabolism                                   |
| 125 | arabinose                                    | Carbohydrate | Pentose Metabolism                                   |
| 126 | arabitol/xylitol                             | Carbohydrate | Pentose Metabolism                                   |
| 127 | arabonate/xylonate                           | Carbohydrate | Pentose Metabolism                                   |
| 128 | sedoheptulose                                | Carbohydrate | Pentose Metabolism                                   |
| 129 | ribulonate/xylulonate/lyxonate*              | Carbohydrate | Pentose Metabolism                                   |
| 130 | maltose                                      | Carbohydrate | Glycogen Metabolism                                  |
| 131 | stachyose                                    | Carbohydrate | Disaccharides and Oligosaccharides                   |
| 132 | sucrose                                      | Carbohydrate | Disaccharides and Oligosaccharides                   |
| 133 | raffinose                                    | Carbohydrate | Disaccharides and Oligosaccharides                   |
| 134 | maltitol/lactitol/cellobiotol/palatinol      | Carbohydrate | Disaccharides and Oligosaccharides                   |
| 135 | fructose                                     | Carbohydrate | Fructose, Mannose and Galactose Metabolism           |
| 136 | mannitol/sorbitol                            | Carbohydrate | Fructose, Mannose and Galactose Metabolism           |
| 137 | mannose                                      | Carbohydrate | Fructose, Mannose and Galactose Metabolism           |

|     |                                           |              |                                                   |
|-----|-------------------------------------------|--------------|---------------------------------------------------|
| 138 | galactonate                               | Carbohydrate | Fructose, Mannose and Galactose Metabolism        |
| 139 | UDP-glucose                               | Carbohydrate | Nucleotide Sugar                                  |
| 140 | UDP-galactose                             | Carbohydrate | Nucleotide Sugar                                  |
| 141 | UDP-N-acetylglucosamine/galactosamine     | Carbohydrate | Nucleotide Sugar                                  |
| 142 | glucuronate                               | Carbohydrate | Aminosugar Metabolism                             |
| 143 | N-acetylglucosamine 6-phosphate           | Carbohydrate | Aminosugar Metabolism                             |
| 144 | N-acetylglucosaminylasparagine            | Carbohydrate | Aminosugar Metabolism                             |
| 145 | erythronate*                              | Carbohydrate | Aminosugar Metabolism                             |
| 146 | N-acetylglucosamine/N-acetylgalactosamine | Carbohydrate | Aminosugar Metabolism                             |
| 147 | N6-carboxymethyllysine                    | Carbohydrate | Advanced Glycation End-product                    |
| 148 | citrate                                   | Energy       | TCA Cycle                                         |
| 149 | aconitate [cis or trans]                  | Energy       | TCA Cycle                                         |
| 150 | isocitrate                                | Energy       | TCA Cycle                                         |
| 151 | isocitric lactone                         | Energy       | TCA Cycle                                         |
| 152 | alpha-ketoglutarate                       | Energy       | TCA Cycle                                         |
| 153 | succinate                                 | Energy       | TCA Cycle                                         |
| 154 | fumarate                                  | Energy       | TCA Cycle                                         |
| 155 | malate                                    | Energy       | TCA Cycle                                         |
| 156 | tricarballylate                           | Energy       | TCA Cycle                                         |
| 157 | 2-methylcitrate                           | Energy       | TCA Cycle                                         |
| 158 | citraconate/glutaconate                   | Energy       | TCA Cycle                                         |
| 159 | phosphate                                 | Energy       | Oxidative Phosphorylation                         |
| 160 | malonate                                  | Lipid        | Fatty Acid Synthesis                              |
| 161 | arachidate (20:0)                         | Lipid        | Long Chain Saturated Fatty Acid                   |
| 162 | hexadecatrienoate (16:3n3)                | Lipid        | Long Chain Polyunsaturated Fatty Acid (n3 and n6) |
| 163 | linoleate (18:2n6)                        | Lipid        | Long Chain Polyunsaturated Fatty Acid (n3 and n6) |
| 164 | linolenate (18:3n3 or 3n6)                | Lipid        | Long Chain Polyunsaturated Fatty Acid (n3 and n6) |
| 165 | glutarate (C5-DC)                         | Lipid        | Fatty Acid, Dicarboxylate                         |
| 166 | 2-hydroxyglutarate                        | Lipid        | Fatty Acid, Dicarboxylate                         |
| 167 | 3-hydroxyadipate                          | Lipid        | Fatty Acid, Dicarboxylate                         |
| 168 | maleate                                   | Lipid        | Fatty Acid, Dicarboxylate                         |
| 169 | dodecenedioate (C12:1-DC)*                | Lipid        | Fatty Acid, Dicarboxylate                         |
| 170 | hexadecanedioate (C16)                    | Lipid        | Fatty Acid, Dicarboxylate                         |
| 171 | octadecanedioate (C18)                    | Lipid        | Fatty Acid, Dicarboxylate                         |
| 172 | octadecenedioate (C18:1-DC)               | Lipid        | Fatty Acid, Dicarboxylate                         |
| 173 | octadecadienedioate (C18:2-DC)*           | Lipid        | Fatty Acid, Dicarboxylate                         |
| 174 | eicosanedioate (C20-DC)                   | Lipid        | Fatty Acid, Dicarboxylate                         |
| 175 | docosadioate (C22-DC)                     | Lipid        | Fatty Acid, Dicarboxylate                         |
| 176 | 2-hydroxysebacate                         | Lipid        | Fatty Acid, Dicarboxylate                         |
| 177 | linoleoylcholine*                         | Lipid        | Fatty Acid Metabolism (Acyl Choline)              |
| 178 | 2-hydroxyarachidate*                      | Lipid        | Fatty Acid, Monohydroxy                           |
| 179 | 2-hydroxybehenate                         | Lipid        | Fatty Acid, Monohydroxy                           |
| 180 | 3-hydroxysebacate                         | Lipid        | Fatty Acid, Monohydroxy                           |
| 181 | 3-hydroxypalmitate                        | Lipid        | Fatty Acid, Monohydroxy                           |
| 182 | 3-hydroxystearate                         | Lipid        | Fatty Acid, Monohydroxy                           |
| 183 | 3-hydroxyarachidate*                      | Lipid        | Fatty Acid, Monohydroxy                           |
| 184 | 3-hydroxybehenate*                        | Lipid        | Fatty Acid, Monohydroxy                           |
| 185 | 16-hydroxypalmitate                       | Lipid        | Fatty Acid, Monohydroxy                           |
| 186 | 13-HODE + 9-HODE                          | Lipid        | Fatty Acid, Monohydroxy                           |
| 187 | 2S,3R-dihydroxybutyrate                   | Lipid        | Fatty Acid, Dihydroxy                             |
| 188 | 2R,3R-dihydroxybutyrate                   | Lipid        | Fatty Acid, Dihydroxy                             |
| 189 | 2,4-dihydroxybutyrate                     | Lipid        | Fatty Acid, Dihydroxy                             |
| 190 | 3,4-dihydroxybutyrate                     | Lipid        | Fatty Acid, Dihydroxy                             |
| 191 | oleoyl ethanolamide                       | Lipid        | Endocannabinoid                                   |
| 192 | linoleoyl ethanolamide                    | Lipid        | Endocannabinoid                                   |
| 193 | linolenoyl ethanolamide                   | Lipid        | Endocannabinoid                                   |
| 194 | myo-inositol                              | Lipid        | Inositol Metabolism                               |
| 195 | inositol 1-phosphate (I1P)                | Lipid        | Inositol Metabolism                               |
| 196 | inositol trisphosphate                    | Lipid        | Inositol Metabolism                               |
| 197 | choline                                   | Lipid        | Phospholipid Metabolism                           |
| 198 | phosphocholine                            | Lipid        | Phospholipid Metabolism                           |
| 199 | glycerophosphorylcholine (GPC)            | Lipid        | Phospholipid Metabolism                           |
| 200 | phosphoethanolamine (PE)                  | Lipid        | Phospholipid Metabolism                           |
| 201 | glycerophosphoethanolamine                | Lipid        | Phospholipid Metabolism                           |
| 202 | glycerophosphoserine*                     | Lipid        | Phospholipid Metabolism                           |
| 203 | glycerophosphoinositol*                   | Lipid        | Phospholipid Metabolism                           |
| 204 | 1-palmitoyl-2-linoleoyl-GPA (16:0/18:2)*  | Lipid        | Phosphatidic acid (PA)                            |
| 205 | 1-palmitoyl-2-linolenoyl-GPA (16:0/18:3)* | Lipid        | Phosphatidic acid (PA)                            |
| 206 | 1-oleoyl-2-linoleoyl-GPA (18:1/18:2)*     | Lipid        | Phosphatidic acid (PA)                            |

|     |                                                                |       |                               |
|-----|----------------------------------------------------------------|-------|-------------------------------|
| 207 | 1,2-dilinoleoyl-GPA (18:2/18:2)*                               | Lipid | Phosphatidic acid (PA)        |
| 208 | 1-linoleoyl-2-linolenoyl-GPA (18:2/18:3)*                      | Lipid | Phosphatidic acid (PA)        |
| 209 | 1,2-dilinenoyl-GPA (18:3/18:3)*                                | Lipid | Phosphatidic acid (PA)        |
| 210 | 1-palmitoyl-2-oleoyl-GPC (16:0/18:1)                           | Lipid | Phosphatidylcholine (PC)      |
| 211 | 1-palmitoyl-2-linoleoyl-GPC (16:0/18:2)                        | Lipid | Phosphatidylcholine (PC)      |
| 212 | 1-palmitoyl-2-alpha-linolenoyl-GPC (16:0/18:3n3)*              | Lipid | Phosphatidylcholine (PC)      |
| 213 | 1-palmitoleoyl-2-linolenoyl-GPC (16:1/18:3)*                   | Lipid | Phosphatidylcholine (PC)      |
| 214 | 1-stearoyl-2-oleoyl-GPC (18:0/18:1)                            | Lipid | Phosphatidylcholine (PC)      |
| 215 | 1-stearoyl-2-linoleoyl-GPC (18:0/18:2)*                        | Lipid | Phosphatidylcholine (PC)      |
| 216 | 1-oleoyl-2-linoleoyl-GPC (18:1/18:2)*                          | Lipid | Phosphatidylcholine (PC)      |
| 217 | 1,2-dilinoleoyl-GPC (18:2/18:2)                                | Lipid | Phosphatidylcholine (PC)      |
| 218 | 1-linoleoyl-2-linolenoyl-GPC (18:2/18:3)*                      | Lipid | Phosphatidylcholine (PC)      |
| 219 | 1,2-dilinenoyl-GPC (18:3/18:3)*                                | Lipid | Phosphatidylcholine (PC)      |
| 220 | 1-palmitoyl-2-oleoyl-GPE (16:0/18:1)                           | Lipid | Phosphatidylethanolamine (PE) |
| 221 | 1-palmitoyl-2-linoleoyl-GPE (16:0/18:2)                        | Lipid | Phosphatidylethanolamine (PE) |
| 222 | 1-stearoyl-2-linoleoyl-GPE (18:0/18:2)*                        | Lipid | Phosphatidylethanolamine (PE) |
| 223 | 1-oleoyl-2-linoleoyl-GPE (18:1/18:2)*                          | Lipid | Phosphatidylethanolamine (PE) |
| 224 | 1,2-dilinoleoyl-GPE (18:2/18:2)*                               | Lipid | Phosphatidylethanolamine (PE) |
| 225 | 1,2-dipalmitoyl-GPG (16:0/16:0)                                | Lipid | Phosphatidylglycerol (PG)     |
| 226 | 1-palmitoyl-2-oleoyl-GPG (16:0/18:1)                           | Lipid | Phosphatidylglycerol (PG)     |
| 227 | 1-palmitoyl-2-linoleoyl-GPG (16:0/18:2)                        | Lipid | Phosphatidylglycerol (PG)     |
| 228 | 1-palmitoyl-2-linolenoyl-GPG (16:0/18:3)*                      | Lipid | Phosphatidylglycerol (PG)     |
| 229 | 1-palmitoyl-2-linoleoyl-GPI (16:0/18:2)                        | Lipid | Phosphatidylinositol (PI)     |
| 230 | 1-stearoyl-2-linoleoyl-GPI (18:0/18:2)                         | Lipid | Phosphatidylinositol (PI)     |
| 231 | 1-palmitoyl-GPA (16:0)                                         | Lipid | Lysophospholipid              |
| 232 | 1-linoleoyl-GPA (18:2)*                                        | Lipid | Lysophospholipid              |
| 233 | 1-linolenoyl-GPA (18:3)*                                       | Lipid | Lysophospholipid              |
| 234 | 1-linolenoyl-GPG (18:3)*                                       | Lipid | Lysophospholipid              |
| 235 | 1-linoleoyl-GPC (18:2)                                         | Lipid | Lysophospholipid              |
| 236 | 1-linolenoyl-GPC (18:3)*                                       | Lipid | Lysophospholipid              |
| 237 | 1-palmitoyl-GPE (16:0)                                         | Lipid | Lysophospholipid              |
| 238 | 1-stearoyl-GPE (18:0)                                          | Lipid | Lysophospholipid              |
| 239 | 1-linoleoyl-GPE (18:2)*                                        | Lipid | Lysophospholipid              |
| 240 | 1-palmitoyl-GPG (16:0)*                                        | Lipid | Lysophospholipid              |
| 241 | 1-linoleoyl-GPG (18:2)*                                        | Lipid | Lysophospholipid              |
| 242 | 1-palmitoyl-GPI* (16:0)                                        | Lipid | Lysophospholipid              |
| 243 | 1-stearoyl-GPI (18:0)                                          | Lipid | Lysophospholipid              |
| 244 | 1-linoleoyl-GPI* (18:2)*                                       | Lipid | Lysophospholipid              |
| 245 | glycerol 3-phosphate                                           | Lipid | Glycerolipid Metabolism       |
| 246 | glycerophosphoglycerol                                         | Lipid | Glycerolipid Metabolism       |
| 247 | 1-palmitoylglycerol (16:0)                                     | Lipid | Monoacylglycerol              |
| 248 | 1-palmitoleoylglycerol (16:1)*                                 | Lipid | Monoacylglycerol              |
| 249 | 1-oleoylglycerol (18:1)                                        | Lipid | Monoacylglycerol              |
| 250 | 1-linoleoylglycerol (18:2)                                     | Lipid | Monoacylglycerol              |
| 251 | 1-linolenoylglycerol (18:3)                                    | Lipid | Monoacylglycerol              |
| 252 | 2-linoleoylglycerol (18:2)                                     | Lipid | Monoacylglycerol              |
| 253 | diacylglycerol (16:1/18:2 [2], 16:0/18:3 [1])*                 | Lipid | Diacylglycerol                |
| 254 | palmitoyl-linoleoyl-glycerol (16:0/18:2) [1]*                  | Lipid | Diacylglycerol                |
| 255 | palmitoyl-linoleoyl-glycerol (16:0/18:2) [2]*                  | Lipid | Diacylglycerol                |
| 256 | palmitoyl-linolenoyl-glycerol (16:0/18:3) [2]*                 | Lipid | Diacylglycerol                |
| 257 | oleoyl-linoleoyl-glycerol (18:1/18:2) [2]                      | Lipid | Diacylglycerol                |
| 258 | oleoyl-linolenoyl-glycerol (18:1/18:3) [2]*                    | Lipid | Diacylglycerol                |
| 259 | linoleoyl-linoleoyl-glycerol (18:2/18:2) [1]*                  | Lipid | Diacylglycerol                |
| 260 | linoleoyl-linoleoyl-glycerol (18:2/18:2) [2]*                  | Lipid | Diacylglycerol                |
| 261 | linoleoyl-linolenoyl-glycerol (18:2/18:3) [1]*                 | Lipid | Diacylglycerol                |
| 262 | linoleoyl-linolenoyl-glycerol (18:2/18:3) [2]*                 | Lipid | Diacylglycerol                |
| 263 | linolenoyl-linolenoyl-glycerol (18:3/18:3) [1]*                | Lipid | Diacylglycerol                |
| 264 | linolenoyl-linolenoyl-glycerol (18:3/18:3) [2]*                | Lipid | Diacylglycerol                |
| 265 | SQDG (18:3/16:0)                                               | Lipid | Diacylglycerol                |
| 266 | galactosylglycerol                                             | Lipid | Galactosyl Glycerolipids      |
| 267 | digalactosylglycerol*                                          | Lipid | Galactosyl Glycerolipids      |
| 268 | 1-palmitoyl-2-linoleoyl-digalactosylglycerol (16:0/18:2)       | Lipid | Galactosyl Glycerolipids      |
| 269 | 1-palmitoyl-2-linoleoyl-galactosylglycerol (16:0/18:2)*        | Lipid | Galactosyl Glycerolipids      |
| 270 | 1-palmitoyl-2-linolenoyl-galactosylglycerol (16:0/18:3)        | Lipid | Galactosyl Glycerolipids      |
| 271 | 1-palmitoyl-2-linolenoyl-digalactosylglycerol (16:0/18:3)      | Lipid | Galactosyl Glycerolipids      |
| 272 | 1-linolenoyl-2-hexadecatrienoyl-galactosylglycerol (18:3/18:3) | Lipid | Galactosyl Glycerolipids      |
| 273 | 1,2-dilinoleoyl-digalactosylglycerol (18:2/18:2)*              | Lipid | Galactosyl Glycerolipids      |
| 274 | 1,2-dilinoleoyl-galactosylglycerol (18:2/18:2)*                | Lipid | Galactosyl Glycerolipids      |
| 275 | 1-linoleoyl-2-linolenoyl-galactosylglycerol (18:2/18:3)*       | Lipid | Galactosyl Glycerolipids      |

|     |                                                          |                     |                                                      |
|-----|----------------------------------------------------------|---------------------|------------------------------------------------------|
| 276 | 1-linoleoyl-2-linolenoyl-digalactosylglycerol (18:2/18:3 | Lipid               | Galactosyl Glycerolipids                             |
| 277 | 1,2-dilinenoyl-galactosylglycerol (18:3/18:3)*           | Lipid               | Galactosyl Glycerolipids                             |
| 278 | 1,2-dilinenoyl-digalactosylglycerol (18:3/18:3)          | Lipid               | Galactosyl Glycerolipids                             |
| 279 | 1-linoleoyl-galactosylglycerol (18:2)*                   | Lipid               | Galactosyl Glycerolipids                             |
| 280 | 1-linoleoyl-digalactosylglycerol (18:2)*                 | Lipid               | Galactosyl Glycerolipids                             |
| 281 | 1-linolenoyl-digalactosylglycerol (18:3)*                | Lipid               | Galactosyl Glycerolipids                             |
| 282 | 2-linolenoyl-digalactosylglycerol (18:3)*                | Lipid               | Galactosyl Glycerolipids                             |
| 283 | sphinganine                                              | Lipid               | Sphingolipid Synthesis                               |
| 284 | phytosphingosine                                         | Lipid               | Sphingolipid Synthesis                               |
| 285 | dehydrophytosphingosine*                                 | Lipid               | Sphingolipid Synthesis                               |
| 286 | sphingosine                                              | Lipid               | Sphingosines                                         |
| 287 | 3-hydroxy-3-methylglutarate                              | Lipid               | Mevalonate Metabolism                                |
| 288 | beta-sitosterol                                          | Lipid               | Sterol                                               |
| 289 | inosine                                                  | Nucleotide          | Purine Metabolism, (Hypo)Xanthine/Inosine containing |
| 290 | hypoxanthine                                             | Nucleotide          | Purine Metabolism, (Hypo)Xanthine/Inosine containing |
| 291 | xanthine                                                 | Nucleotide          | Purine Metabolism, (Hypo)Xanthine/Inosine containing |
| 292 | xanthosine                                               | Nucleotide          | Purine Metabolism, (Hypo)Xanthine/Inosine containing |
| 293 | allantoin                                                | Nucleotide          | Purine Metabolism, (Hypo)Xanthine/Inosine containing |
| 294 | allantoic acid                                           | Nucleotide          | Purine Metabolism, (Hypo)Xanthine/Inosine containing |
| 295 | AMP                                                      | Nucleotide          | Purine Metabolism, Adenine containing                |
| 296 | 3'-AMP                                                   | Nucleotide          | Purine Metabolism, Adenine containing                |
| 297 | adenosine-2',3'-cyclic monophosphate                     | Nucleotide          | Purine Metabolism, Adenine containing                |
| 298 | adenylosuccinate                                         | Nucleotide          | Purine Metabolism, Adenine containing                |
| 299 | adenosine                                                | Nucleotide          | Purine Metabolism, Adenine containing                |
| 300 | adenine                                                  | Nucleotide          | Purine Metabolism, Adenine containing                |
| 301 | 1-methyladenine                                          | Nucleotide          | Purine Metabolism, Adenine containing                |
| 302 | 2'-O-methyladenosine                                     | Nucleotide          | Purine Metabolism, Adenine containing                |
| 303 | 2'-deoxyadenosine                                        | Nucleotide          | Purine Metabolism, Adenine containing                |
| 304 | N6-succinyladenosine                                     | Nucleotide          | Purine Metabolism, Adenine containing                |
| 305 | 5'- GMP                                                  | Nucleotide          | Purine Metabolism, Guanine containing                |
| 306 | guanosine 3'-monophosphate (3'-GMP)                      | Nucleotide          | Purine Metabolism, Guanine containing                |
| 307 | guanosine-2',3'-cyclic monophosphate                     | Nucleotide          | Purine Metabolism, Guanine containing                |
| 308 | guanosine                                                | Nucleotide          | Purine Metabolism, Guanine containing                |
| 309 | guanine                                                  | Nucleotide          | Purine Metabolism, Guanine containing                |
| 310 | 1-methylguanine                                          | Nucleotide          | Purine Metabolism, Guanine containing                |
| 311 | N-carbamoylaspartate                                     | Nucleotide          | Pyrimidine Metabolism, Orotate containing            |
| 312 | dihydroorotate                                           | Nucleotide          | Pyrimidine Metabolism, Orotate containing            |
| 313 | orotate                                                  | Nucleotide          | Pyrimidine Metabolism, Orotate containing            |
| 314 | UMP                                                      | Nucleotide          | Pyrimidine Metabolism, Uracil containing             |
| 315 | uridine-2',3'-cyclic monophosphate                       | Nucleotide          | Pyrimidine Metabolism, Uracil containing             |
| 316 | uridine                                                  | Nucleotide          | Pyrimidine Metabolism, Uracil containing             |
| 317 | uracil                                                   | Nucleotide          | Pyrimidine Metabolism, Uracil containing             |
| 318 | pseudouridine                                            | Nucleotide          | Pyrimidine Metabolism, Uracil containing             |
| 319 | 5,6-dihydrouridine                                       | Nucleotide          | Pyrimidine Metabolism, Uracil containing             |
| 320 | 3-ureidopropionate                                       | Nucleotide          | Pyrimidine Metabolism, Uracil containing             |
| 321 | beta-alanine                                             | Nucleotide          | Pyrimidine Metabolism, Uracil containing             |
| 322 | 3-(3-amino-3-carboxypropyl)uridine*                      | Nucleotide          | Pyrimidine Metabolism, Uracil containing             |
| 323 | CMP                                                      | Nucleotide          | Pyrimidine Metabolism, Cytidine containing           |
| 324 | cytidine 2' or 3'-monophosphate (2' or 3'-CMP)           | Nucleotide          | Pyrimidine Metabolism, Cytidine containing           |
| 325 | cytidine 2',3'-cyclic monophosphate                      | Nucleotide          | Pyrimidine Metabolism, Cytidine containing           |
| 326 | cytidine                                                 | Nucleotide          | Pyrimidine Metabolism, Cytidine containing           |
| 327 | cytosine                                                 | Nucleotide          | Pyrimidine Metabolism, Cytidine containing           |
| 328 | thymidine                                                | Nucleotide          | Pyrimidine Metabolism, Thymine containing            |
| 329 | 3-aminoisobutyrate                                       | Nucleotide          | Pyrimidine Metabolism, Thymine containing            |
| 330 | methylphosphate                                          | Nucleotide          | Purine and Pyrimidine Metabolism                     |
| 331 | nicotinate                                               | Cofactors and Vitar | Nicotinate and Nicotinamide Metabolism               |
| 332 | nicotinate ribonucleoside                                | Cofactors and Vitar | Nicotinate and Nicotinamide Metabolism               |
| 333 | nicotinamide                                             | Cofactors and Vitar | Nicotinate and Nicotinamide Metabolism               |
| 334 | nicotinamide ribonucleotide (NMN)                        | Cofactors and Vitar | Nicotinate and Nicotinamide Metabolism               |
| 335 | nicotinamide riboside                                    | Cofactors and Vitar | Nicotinate and Nicotinamide Metabolism               |
| 336 | NAD+                                                     | Cofactors and Vitar | Nicotinate and Nicotinamide Metabolism               |
| 337 | trigonelline (N'-methylnicotinate)                       | Cofactors and Vitar | Nicotinate and Nicotinamide Metabolism               |
| 338 | pantothenate (Vitamin B5)                                | Cofactors and Vitar | Pantothenate and CoA Metabolism                      |
| 339 | ascorbate (Vitamin C)                                    | Cofactors and Vitar | Ascorbate and Aldarate Metabolism                    |
| 340 | dehydroascorbate                                         | Cofactors and Vitar | Ascorbate and Aldarate Metabolism                    |
| 341 | 2-O-methylascorbic acid                                  | Cofactors and Vitar | Ascorbate and Aldarate Metabolism                    |
| 342 | threonate                                                | Cofactors and Vitar | Ascorbate and Aldarate Metabolism                    |
| 343 | gulonate*                                                | Cofactors and Vitar | Ascorbate and Aldarate Metabolism                    |
| 344 | alpha-tocopherol                                         | Cofactors and Vitar | Tocopherol Metabolism                                |

|     |                                     |                                           |
|-----|-------------------------------------|-------------------------------------------|
| 345 | delta-tocopherol                    | Cofactors and Vitar Tocopherol Metabolism |
| 346 | gamma-tocopherol/beta-tocopherol    | Cofactors and Vitar Tocopherol Metabolism |
| 347 | thiamin (Vitamin B1)                | Cofactors and Vitar Thiamine Metabolism   |
| 348 | carotene diol (1)                   | Cofactors and Vitar Vitamin A Metabolism  |
| 349 | carotene diol (2)                   | Cofactors and Vitar Vitamin A Metabolism  |
| 350 | carotene diol (3)                   | Cofactors and Vitar Vitamin A Metabolism  |
| 351 | pyridoxine (Vitamin B6)             | Cofactors and Vitar Vitamin B6 Metabolism |
| 352 | pyridoxamine                        | Cofactors and Vitar Vitamin B6 Metabolism |
| 353 | pyridoxal                           | Cofactors and Vitar Vitamin B6 Metabolism |
| 354 | pyridoxate                          | Cofactors and Vitar Vitamin B6 Metabolism |
| 355 | 4-hydroxybenzoate                   | Xenobiotics Benzoate Metabolism           |
| 356 | 2,4,6-trihydroxybenzoate            | Xenobiotics Benzoate Metabolism           |
| 357 | 3-hydroxybenzaldehyde               | Xenobiotics Benzoate Metabolism           |
| 358 | benzoyl-O-glucose                   | Xenobiotics Benzoate Metabolism           |
| 359 | 3-(4-hydroxyphenyl)propionate       | Xenobiotics Benzoate Metabolism           |
| 360 | kaempferol                          | Xenobiotics Food Component/Plant          |
| 361 | kaempferol 7-O-glucoside            | Xenobiotics Food Component/Plant          |
| 362 | dihydrokaempferol                   | Xenobiotics Food Component/Plant          |
| 363 | quercetin                           | Xenobiotics Food Component/Plant          |
| 364 | quercetin 3-galactoside             | Xenobiotics Food Component/Plant          |
| 365 | indoleacetylaspartate               | Xenobiotics Food Component/Plant          |
| 366 | genistein                           | Xenobiotics Food Component/Plant          |
| 367 | shikimate                           | Xenobiotics Food Component/Plant          |
| 368 | 3-dehydroshikimate                  | Xenobiotics Food Component/Plant          |
| 369 | catechin                            | Xenobiotics Food Component/Plant          |
| 370 | epicatechin                         | Xenobiotics Food Component/Plant          |
| 371 | cosmosiin                           | Xenobiotics Food Component/Plant          |
| 372 | apigenin                            | Xenobiotics Food Component/Plant          |
| 373 | luteolin                            | Xenobiotics Food Component/Plant          |
| 374 | luteolin 7-O-glucoside              | Xenobiotics Food Component/Plant          |
| 375 | vanillate                           | Xenobiotics Food Component/Plant          |
| 376 | vanillin                            | Xenobiotics Food Component/Plant          |
| 377 | 2,3-dihydroxyisovalerate            | Xenobiotics Food Component/Plant          |
| 378 | 2-isopropylmalate                   | Xenobiotics Food Component/Plant          |
| 379 | 3-formylindole                      | Xenobiotics Food Component/Plant          |
| 380 | gluconate                           | Xenobiotics Food Component/Plant          |
| 381 | abscisate                           | Xenobiotics Food Component/Plant          |
| 382 | beta-guanidinopropanoate            | Xenobiotics Food Component/Plant          |
| 383 | caffate                             | Xenobiotics Food Component/Plant          |
| 384 | 3-hydroxycinnamate                  | Xenobiotics Food Component/Plant          |
| 385 | chlorogenate                        | Xenobiotics Food Component/Plant          |
| 386 | chrysin                             | Xenobiotics Food Component/Plant          |
| 387 | chrysoeriol                         | Xenobiotics Food Component/Plant          |
| 388 | coumaroylquininate (2)              | Xenobiotics Food Component/Plant          |
| 389 | coumaroylquininate (3)              | Xenobiotics Food Component/Plant          |
| 390 | coumaroylquininate (4)              | Xenobiotics Food Component/Plant          |
| 391 | coumaroylquininate (5)              | Xenobiotics Food Component/Plant          |
| 392 | cryptochlorogenic acid              | Xenobiotics Food Component/Plant          |
| 393 | deoxymugineic acid                  | Xenobiotics Food Component/Plant          |
| 394 | dihydroferulate                     | Xenobiotics Food Component/Plant          |
| 395 | dihydroquercetin                    | Xenobiotics Food Component/Plant          |
| 396 | eriodictyol                         | Xenobiotics Food Component/Plant          |
| 397 | erythritol                          | Xenobiotics Food Component/Plant          |
| 398 | ferulate                            | Xenobiotics Food Component/Plant          |
| 399 | quininate                           | Xenobiotics Food Component/Plant          |
| 400 | feruloylquininate (1)               | Xenobiotics Food Component/Plant          |
| 401 | feruloylquininate (2)               | Xenobiotics Food Component/Plant          |
| 402 | feruloylquininate (3)               | Xenobiotics Food Component/Plant          |
| 403 | feruloylquininate (4)               | Xenobiotics Food Component/Plant          |
| 404 | feruloylquininate (5)               | Xenobiotics Food Component/Plant          |
| 405 | fucitol                             | Xenobiotics Food Component/Plant          |
| 406 | histidine betaine (hercynine)*      | Xenobiotics Food Component/Plant          |
| 407 | homocitrate                         | Xenobiotics Food Component/Plant          |
| 408 | hydroquinone beta-D-glucopyranoside | Xenobiotics Food Component/Plant          |
| 409 | isorhamnetin 3-rutinoside           | Xenobiotics Food Component/Plant          |
| 410 | isorhamnetin                        | Xenobiotics Food Component/Plant          |
| 411 | lariciresinol 4-O-glucoside         | Xenobiotics Food Component/Plant          |
| 412 | lariciresinol                       | Xenobiotics Food Component/Plant          |
| 413 | mannonate*                          | Xenobiotics Food Component/Plant          |

|     |                                       |                      |                                   |
|-----|---------------------------------------|----------------------|-----------------------------------|
| 414 | dihydroroxylin                        | Xenobiotics          | Food Component/Plant              |
| 415 | naringenin 7-O-glucoside              | Xenobiotics          | Food Component/Plant              |
| 416 | naringenin                            | Xenobiotics          | Food Component/Plant              |
| 417 | nicotianamine                         | Xenobiotics          | Food Component/Plant              |
| 418 | oleanolate                            | Xenobiotics          | Food Component/Plant              |
| 419 | pheophorbide A                        | Xenobiotics          | Food Component/Plant              |
| 420 | pheophytin A                          | Xenobiotics          | Food Component/Plant              |
| 421 | pinoresinol                           | Xenobiotics          | Food Component/Plant              |
| 422 | procyanidin B1                        | Xenobiotics          | Food Component/Plant              |
| 423 | procyanidin B2                        | Xenobiotics          | Food Component/Plant              |
| 424 | quercetin 3-glucoside                 | Xenobiotics          | Food Component/Plant              |
| 425 | rutin                                 | Xenobiotics          | Food Component/Plant              |
| 426 | stachydrine                           | Xenobiotics          | Food Component/Plant              |
| 427 | methyl glucopyranoside (alpha + beta) | Xenobiotics          | Food Component/Plant              |
| 428 | kaempferol 3-O-glucoside/galactoside  | Xenobiotics          | Food Component/Plant              |
| 429 | tamarixetin                           | Xenobiotics          | Food Component/Plant              |
| 430 | 2-hydroxycinnamate                    | Xenobiotics          | Food Component/Plant              |
| 431 | 4-hydroxycinnamate                    | Xenobiotics          | Food Component/Plant              |
| 432 | sakuranetin                           | Xenobiotics          | Food Component/Plant              |
| 433 | 2-dimethylaminoethanol                | Xenobiotics          | Food Component/Plant              |
| 434 | ethyl beta-glucopyranoside            | Xenobiotics          | Food Component/Plant              |
| 435 | NP-000890                             | Xenobiotics          | Food Component/Plant              |
| 436 | NP-004685                             | Xenobiotics          | Food Component/Plant              |
| 437 | salicylate-glucoside                  | Xenobiotics          | Drug - Analgesics, Anesthetics    |
| 438 | salidroside                           | Xenobiotics          | Drug - Psychoactive               |
| 439 | salicylate                            | Xenobiotics          | Drug - Topical Agents             |
| 440 | 2,6-dihydroxybenzoic acid             | Xenobiotics          | Drug - Topical Agents             |
| 441 | sulfate*                              | Xenobiotics          | Chemical                          |
| 442 | O-sulfo-L-tyrosine                    | Xenobiotics          | Chemical                          |
| 443 | dexpanthenol                          | Xenobiotics          | Chemical                          |
| 444 | gentisic acid-5-glucoside             | Xenobiotics          | Chemical                          |
| 445 | pentose acid*                         | Partially Characteri | Partially Characterized Molecules |
